# Supplementary material for: Spine-Related Malpractice Claims in China: A 2-year National Analysis
Source: PubMed Central journal article supplement — Global Spine J. 2021 Sep 14;13(6):1566–75. doi: 10.1177/21925682211041048 (PMC10448087; doi:10.1177/21925682211041048), 2021-09-14
Supplement: sj-pdf-1-gsj-10.1177_21925682211041048.pdf [file sj-pdf-1-gsj-10.1177_21925682211041048.pdf]

Supplementary File 1- Supplemental material for Spine-Related Malpractice Claims in China: A 2-year National Analysis

Supplemental material, Supplementary File 1, for Spine-Related Malpractice Claims in China: A 2-year National Analysis by Yue et al in Global Spine Journal.

---

| Grade   | Interpretation                                                               |
|---------|------------------------------------------------------------------------------|
| Level 1 | Causing death, severe disability or plant survival.                          |
| Level 2 | Causing moderate disability, organ and tissue damage or serious dysfunction. |
| Level 3 | Causing slight disability, organ and tissue damage or general dysfunction.   |
| Level 4 | Causing other consequences of obvious personal injury to the patient.        |

---

Table 1. Grading of damage to patients in China

([http://www.gov.cn/zhengce/2020-12/26/content\\_5575291.htm](http://www.gov.cn/zhengce/2020-12/26/content_5575291.htm), in Chinese)

---

| Medical responsibility    | Interpretation                                                                                                                    |
|---------------------------|-----------------------------------------------------------------------------------------------------------------------------------|
| Full responsibility       | The damage consequence of medical dispute is completely caused by medical negligence.                                             |
| Main responsibility       | The damage consequence of medical dispute is mainly caused by medical negligence, and non-medical factors play a secondary role.  |
| Reciprocal responsibility | The damage consequence of medical dispute is caused by medical negligence and non-medical factors, which have the same effect.    |
| Secondary responsibility  | The damage consequence of medical dispute is mainly caused by non-medical factors, and medical negligence plays a secondary role. |
| Minor responsibility      | The damage consequence of medical dispute is mainly caused by non-medical factors, and medical negligence plays a minor role.     |
| Non-responsibility        | The damage consequence of medical dispute is completely caused by other factors than medical negligence.                          |

---

Table 2. Grading of medical responsibility for medical disputes in China

([http://www.gov.cn/banshi/2005-08/02/content\\_19194.htm](http://www.gov.cn/banshi/2005-08/02/content_19194.htm), in Chinese)
