# Supplementary material for: Spine-Related Malpractice Claims in China: A 2-year National Analysis
Source: PubMed Central journal article supplement — Global Spine J. 2021 Sep 14;13(6):1566–75. doi: 10.1177/21925682211041048 (PMC10448087; doi:10.1177/21925682211041048), 2021-09-14
Supplement: sj-pdf-3-gsj-10.1177_21925682211041048.pdf [file sj-pdf-3-gsj-10.1177_21925682211041048.pdf]

## Statement

In the manuscript entitled "Spine-related Malpractice Claims in China: A 2-year National Analysis (GSJ-21-0303)" submitting to Global Spine Journal, we announce that Dr Yingze Zhang, from Department of Orthopedic Surgery, The Third Hospital of Hebei Medical University, is added as a listing author for his contribution to this manuscript in assistance in drafting as well as English grammar checking.

Dr. Yingze Zhang declares no conflict of interest.

All already-listed authors agreed with this decision.

|                      |                                                                                                                       |
|----------------------|-----------------------------------------------------------------------------------------------------------------------|
| Name: Lei Yue,       | Signature: 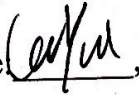 , Date: 2021. July. 20  |
| Name: Mingshuai Sun, | Signature:  , Date: 2021. July 20  |
| Name: Meixia Shang,  | Signature:  , Date: 2021 July. 20  |
| Name: Chunde Li,     | Signature:  , Date: 2021. July. 20 |
| Name: Haolin Sun,    | Signature:  , Date: 2021. July, 20 |
